# Supplementary material for: Increased Expression of the Mitochondrial Glucocorticoid Receptor Enhances Tumor Aggressiveness in a Mouse Xenograft Model
Source: MDPI journal article supplement (doi:10.3390/ijms24043740), 2023-02-13
Supplement: s1 [file s1]

**Table S1**

| <b>Chemicals</b>                                          | <b>Company (Code)</b>             |
|-----------------------------------------------------------|-----------------------------------|
| NAD                                                       | Sigma-Aldrich (N0632)             |
| Thiamine pyrophosphate (TPP)                              | Sigma-Aldrich (C8754)             |
| Iodonitrotetrazolium violet-formazan<br>Crystalline (INT) | Sigma-Aldrich (I7375)             |
| Phenazine methosulfate (PMS)                              | Sigma-Aldrich (P9625)             |
| MgCL2                                                     | Alfa Aesar GmbH (12315)           |
| DTT                                                       | BioChemica AppliChem (A1101,0005) |
| Co-A                                                      | AppliChem (A0812,0025)            |
| BSA                                                       | Sigma (A9418-10G)                 |
| Potassium phosphate                                       | SERVA (26887.02)                  |
| 5,5-dithio-bis-(2-nitrobenzoic acid) (DTNB)               | Sigma-Aldrich (D218200)           |
| Oxaloacetate                                              | Sigma -Aldrich O4126              |
| Acetyl-CoA                                                | Sigma-Aldrich (A2056)             |
| Triton-X 100                                              | Sigma (102233830)                 |
| Sodium Pyruvate                                           | Sigma-Aldrich (P2256)             |

**Table S1.** List of chemicals, source, and codes
