# Supplementary material for: Increased Expression of the Mitochondrial Glucocorticoid Receptor Enhances Tumor Aggressiveness in a Mouse Xenograft Model
Source: MDPI journal article supplement (doi:10.3390/ijms24043740), 2023-02-13
Supplement: s1 [file s1]

Supplementary Figure S1

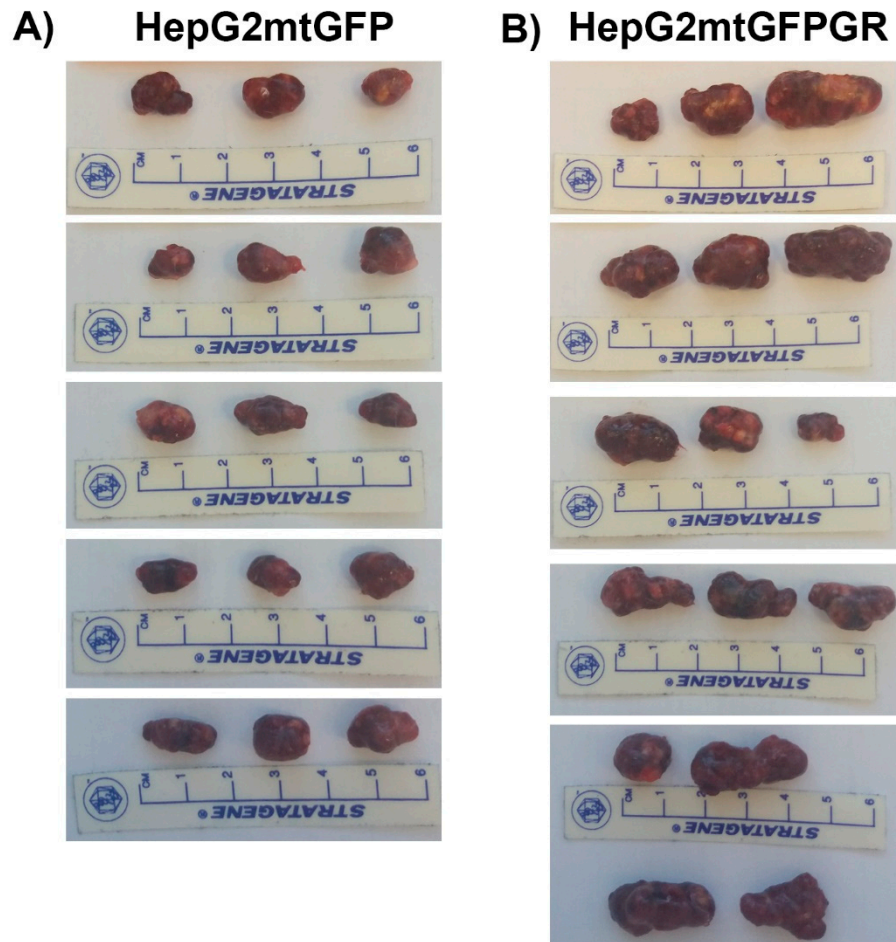

**Figure S1. HepG2 tumors generated in NOD/SCID mice.** Each mouse was inoculated bilaterally in the axillary regions of the rear flanks with A)  $1 \times 10^6$  HepG2mtGFP cells or B)  $1 \times 10^6$  HepG2mtGFPGR cells.  $n=8/\text{group}$  (two tumors/mouse). In the HepG2mtGFP group out of the 16 injections 15 tumors were developed.
