# Supplementary material for: Increased Expression of the Mitochondrial Glucocorticoid Receptor Enhances Tumor Aggressiveness in a Mouse Xenograft Model
Source: MDPI journal article supplement (doi:10.3390/ijms24043740), 2023-02-13
Supplement: s1 [file s1]

Supplementary Figure S2

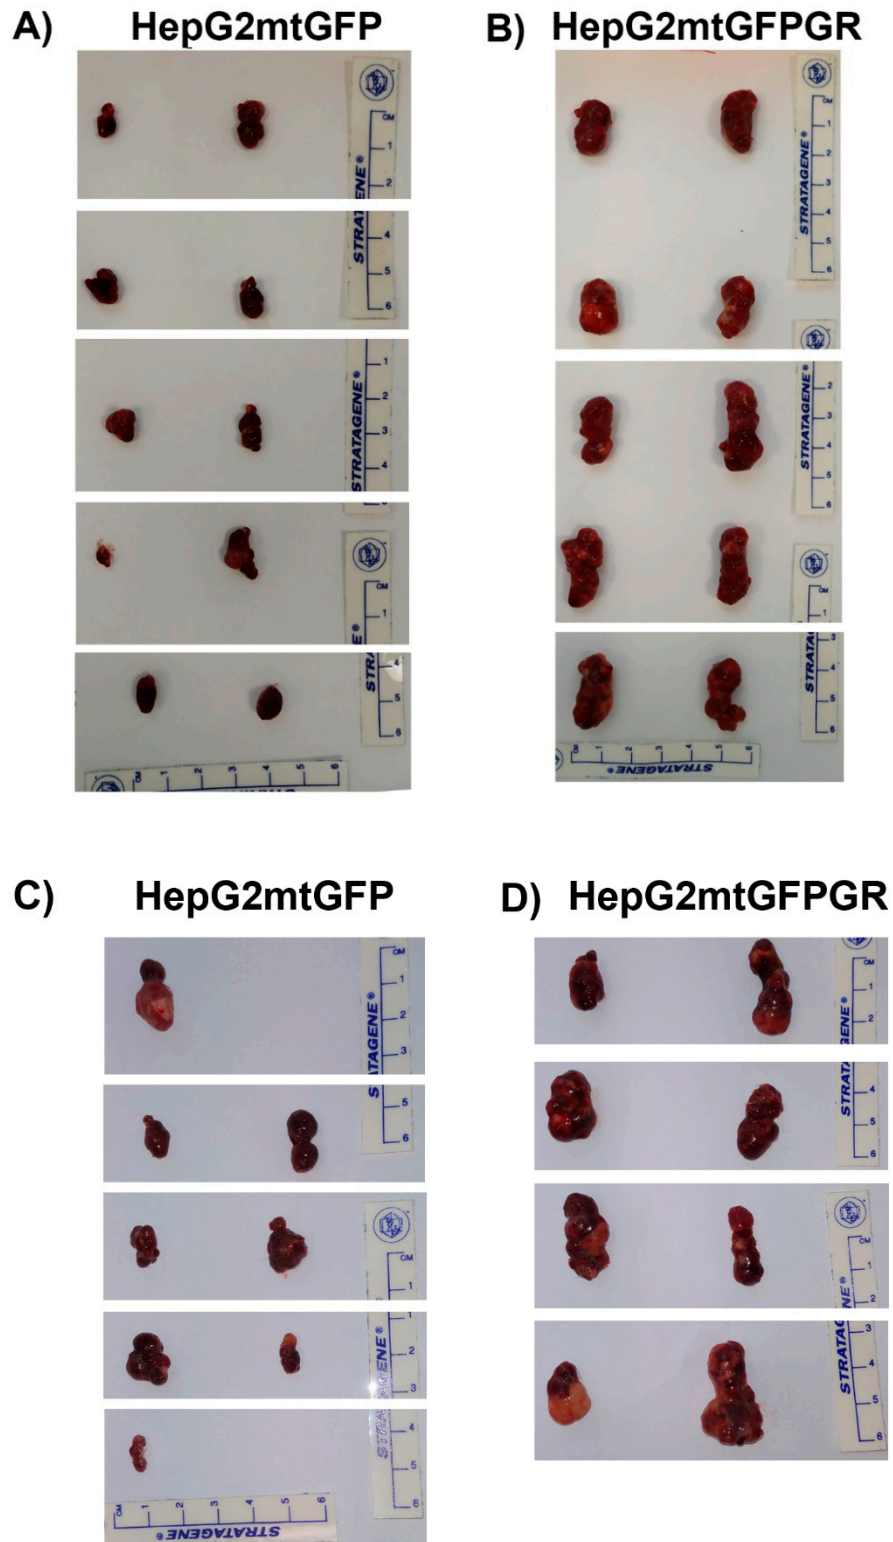

**Figure S2. HepG2 tumors generated in NSG mice.** Each mouse was inoculated bilaterally in the axillary regions of the rear flanks with A)  $1 \times 10^5$  HepG2mtGFP cells, B)  $1 \times 10^5$  HepG2mtGFPGR cells, C)  $1 \times 10^4$  HepG2mtGFP cells, D)  $1 \times 10^4$  HepG2mtGFPGR cells,  $n=5$  (2 tumors/mouse)/group. In the case of C out of the 10 injections were developed 8 tumors

while in D one mouse found dead on the day of tumors' excision and thus was not included in the postmortem analysis.
